# Supplementary material for: Bacteria-Derived Protein Aggregates Contribute to the Disruption of Host Proteostasis
Source: Preprints.org preprint supplement (doi:10.20944/preprints202203.0267.v1), 2022-03-18
Supplement: Supplementary file 1 [file supplementary]

## Sheet: Sheet1
REAGENT OR RESOURCE	SOURCE	IDENTIFIER
Bacterial strains
E. coli OP50	Caenorhabditis Genetics Center	WB OP50; RRID: WB-STRAIN: OP50; NCBI TaxID: 637912; DC199
Pseudomonas aeruginosa PAO1	Shuman Lab (University of Chicago)	PAO1; DC3
Prevotella corporis	BEI Resources	HM1294, MJR7716
E. coli WT	Dr. Roy Curtiss III Lab (University of Florida)	χ7122
E. coli ∆rpoS	Dr. Roy Curtiss III Lab (University of Florida)	χ7149
C. elegans strains
AM738: rmIs297[vha-6p::q44::yfp; rol-6(su1006)]	Morimoto Lab (Northwestern University)	AM738, Q44::YFP
Chemicals and commercial assays
Cholesterol	Fisher Scientific	Cat#ICN10138201
Sodium butyrate	Fisher Scientific	Cat#A11079-22
Criterion™ XT Precast Gel	BioRad	Cat#3450124
XT 4x Sample Buffer	BioRad	Cat#1610791
XT 20X Reducing Agent	BioRad	Cat#1610792
XT MOPS	BioRad	Cat#1610788
Congo Red	Acros Organics	Cat#22962-0250
Brilliant Blue G-250	Fisher Biotech	CAS#6104-58-1
LB (Lennox)	Apex	Cat#11-125
ProteoStat™ Protein aggregation assay	Enzo	Product #ENZ-51023-KP002
Reinforced clostridial broth (RCB)	Oxoid	Code CM0149
Potassium Phosphate Monobasic	Fisher Scientific	Cat#P285-500
Ethylenediaminetetraacetic Acid (EDTA)	Fisher Scientific	Cat#S311-100
IGEPAL® CA-630	Sigma Aldrich	Cat#I8896
Brilliant Blue R-250	Fisher BioReagents	Cat#BP101-25
Isopropanol	Fisher Scientific	Cat#BP2618-1
Glacial Acetic Acid	Fisher Scientific	Cat#A38-212
Sucrose	Sigma Aldrich	Cat#S9378-500G
Tris base	Research Products International	Cat#T60040-1000.0
Acetone	Fisher Scientific	Cat#A18P-4
Trichloroacetic Acid	Fisher Scientific	Cat#A322-500
Gentamicin	Fisher Scientific	Cat#15750060
BenzonaseTM nuclease	Sigma Aldrich	Cat#E1014-5KU
Lysozyme	Sigma Aldrich	Cat#L6876
Precision Plus Protein Dual Color Standards	BioRad	Cat#1610374
Phenylmethylsulfonyl fluoride (PMSF)	Sigma Aldrich	Cat#P7626
AnaeroPack™-Anaero Anaerobic Gas Generator	ThermoFisher Scientific	Cat#R681001
Fisher BioReagents™ Agar	Fisher Scientific	Cat#BP1423-2
BD Bacto™ Tryptic Soy Broth without Dextrose	Becton, Dickinson and Company	Cat#286220
Defibrinated Sheep Blood	ThermoFisher Scientific	Cat#R54020
Thermo Scientific™ AnaeroPack™ 7.0L Rectangular Jar	Fisher Scientific	Cat#23-246-387
Equipment Used
Beadbug™3 Microtube Homogenizer	Benchmark Scientific	Cat#D1030
The Belly Dancer™ Orbital Platform Shaker	IBI Scientific	Cat#BDRLS0001
Tecan Infinite M Nano+ Microplate Reader	Tecan	Cat#30190087
Leica MZ10F Modular Stereo Microscope	Leica Microsystems	Cat#10450103
Zeiss Axiovert S100	Zeiss
Archrostigmat 10X Ph1 phase-contrast infinity objective (0.25NA) Chroma EGFP/FITC long-pass filter set (19002)	Zeiss
CoolLED pE300lite 365 dir mount STEREO	CoolLED	Cat#pE-300-LT-D-MB-YYY-ZZ
Eyepiece, 10x23B, adjustable, 3d gen	Leica Microsystems	Cat#10450910
Filter set ET GFP- MZ10F	Leica Microsystems	Cat#10450588
PowerPac 300 Electrophoresis Power Supply	BioRad	Cat#1655050
Criterion™ Cell	BioRad	Cat#1656001
Lysing Matrix A	MP Biomedicals	Cat#116910050-CF
iBright FL1000 Imaging System	Invitrogen	Cat#A32752
Software and Algorithms
GraphPad Prism v9.3.1	GraphPad Software, Inc	https://www.graphpad.com
FIJI Image Processing Package	Image J	https://imagej.net/software/fiji/
BioRender	BioRender	www.biorender.com
